# Supplementary material for: The DNMT3A PWWP domain is essential for the normal DNA methylation landscape in mouse somatic cells and oocytes
Source: PubMed Central journal article supplement (PMC8162659; doi:10.1371/journal.pgen.1009570), 2021-05-28
Supplement: pgen.1009570.s003.pdf [file pgen.1009570.s003.pdf]

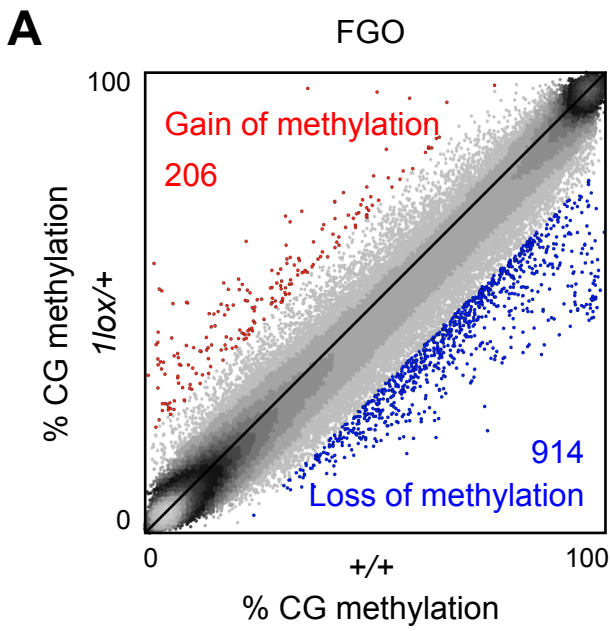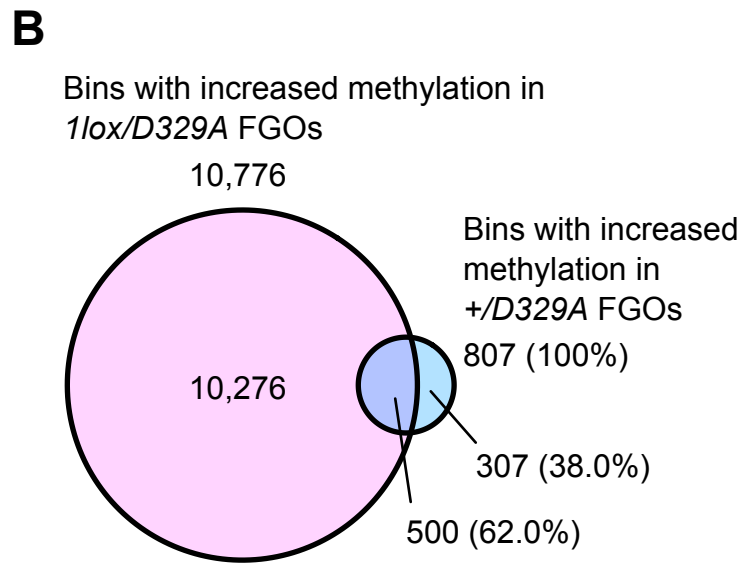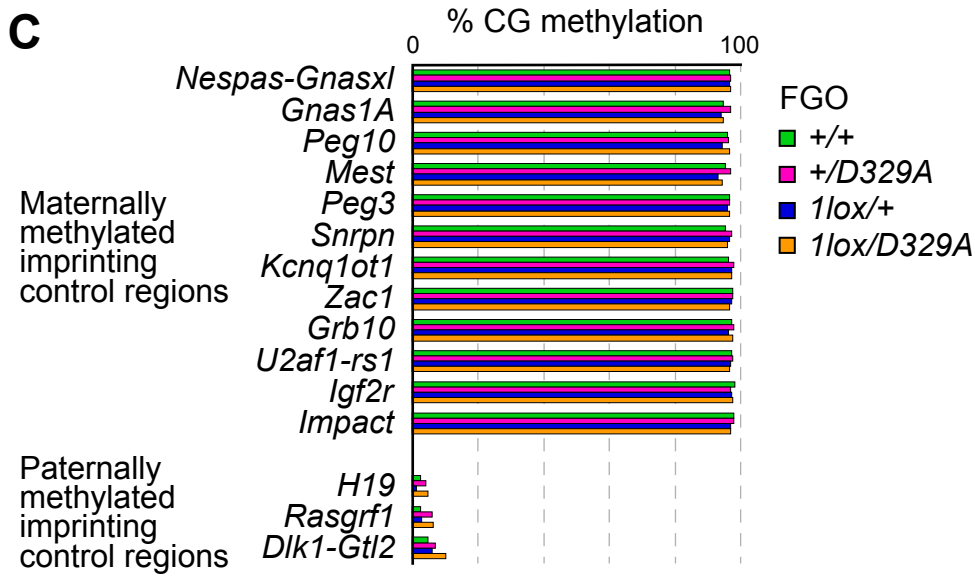

**S3 Fig**
