# Supplementary material for: The DNMT3A PWWP domain is essential for the normal DNA methylation landscape in mouse somatic cells and oocytes
Source: PubMed Central journal article supplement (PMC8162659; doi:10.1371/journal.pgen.1009570), 2021-05-28
Supplement: pgen.1009570.s007.pdf [file pgen.1009570.s007.pdf]

**S1 Table. WGBS and mapping summary**

| Sample               |             | Sequenced reads | Mapped reads | Average depth | Bisulfite conversion rate | Pearson's correlation coefficient between the replicates* |
|----------------------|-------------|-----------------|--------------|---------------|---------------------------|-----------------------------------------------------------|
| Tail tip +/+         | Replicate 1 | 155,724,488     | 66,027,515   |               | 99.55                     |                                                           |
|                      | Replicate 2 | 194,570,658     | 88,370,180   |               | 99.48                     |                                                           |
|                      | Total       | 350,295,146     | 154,397,695  | 6.1           |                           | 0.91                                                      |
| Tail tip +/D329A     | Replicate 1 | 160,306,650     | 73,483,679   |               | 99.55                     |                                                           |
|                      | Replicate 2 | 190,317,336     | 85,972,328   |               | 99.48                     |                                                           |
|                      | Total       | 350,623,986     | 159,456,007  | 6.3           |                           | 0.90                                                      |
| Tail tip D329A/D329A | Replicate 1 | 139,611,314     | 60,443,737   |               | 99.54                     |                                                           |
|                      | Replicate 2 | 167,962,225     | 71,578,857   |               | 99.48                     |                                                           |
|                      | Total       | 307,573,539     | 132,022,594  | 5.3           |                           | 0.89                                                      |
| FGO +/+              | Replicate 1 | 505,301,382     | 201,291,987  |               | 99.56                     |                                                           |
|                      | Replicate 2 | 146,686,918     | 63,184,564   |               | 99.49                     |                                                           |
|                      | Total       | 651,988,300     | 264,476,551  | 9.1           |                           | 0.99                                                      |
| FGO +/D329A          | Replicate 1 | 493,584,738     | 218,034,356  |               | 99.52                     |                                                           |
|                      | Replicate 2 | 293,042,173     | 131,010,714  |               | 99.49                     |                                                           |
|                      | Total       | 786,626,911     | 349,045,070  | 11.9          |                           | 0.99                                                      |
| FGO 1lox/+           | Replicate 1 | 736,317,388     | 339,976,991  |               | 99.49                     |                                                           |
|                      | Replicate 2 | 412,936,757     | 190,930,251  |               | 99.53                     |                                                           |
|                      | Total       | 1,149,254,145   | 530,907,242  | 18.2          |                           | 0.99                                                      |
| FGO 1lox/D329A       | Replicate 1 | 543,847,469     | 263,348,697  |               | 99.47                     |                                                           |
|                      | Replicate 2 | 583,700,308     | 275,340,566  |               | 99.52                     |                                                           |
|                      | Total       | 1,127,547,777   | 538,689,263  | 18.4          |                           | 0.99                                                      |
| FGO +/+ (P25)        |             | 273,128,977     | 116,715,775  | 4.0           | 99.47                     |                                                           |
| FGO +/D329A (P25)    |             | 279,921,232     | 131,125,268  | 4.6           | 99.53                     |                                                           |
| FGO 1lox/+ (P25)     |             | 141,804,280     | 66,794,842   | 2.3           | 99.53                     |                                                           |
| FGO 1lox/D329A (P25) |             | 135,430,105     | 62,487,630   | 2.2           | 99.55                     |                                                           |

\* The correlation coefficient of CG methylation levels for the replicates was calculated across all 10-kb bins.
