# Supplementary material for: The DNMT3A PWWP domain is essential for the normal DNA methylation landscape in mouse somatic cells and oocytes
Source: PubMed Central journal article supplement (PMC8162659; doi:10.1371/journal.pgen.1009570), 2021-05-28
Supplement: pgen.1009570.s008.pdf [file pgen.1009570.s008.pdf]

**S2 Table. RNA-seq and mapping summary**

| Sample         |             | Sequenced reads | Mapped reads | Pearson's correlation coefficient between the replicates |
|----------------|-------------|-----------------|--------------|----------------------------------------------------------|
| FGO +/+        | Replicate 1 | 33,630,431      | 30,316,710   | 0.986                                                    |
|                | Replicate 2 | 49,383,627      | 44,457,140   |                                                          |
|                | Total       | 83,014,058      | 74,773,850   |                                                          |
| FGO +/D329A    | Replicate 1 | 48,780,055      | 43,545,742   | 0.989                                                    |
|                | Replicate 2 | 42,281,804      | 37,460,438   |                                                          |
|                | Total       | 91,061,859      | 81,006,180   |                                                          |
| FGO 1lox/+     | Replicate 1 | 53,527,580      | 46,499,443   | 0.987                                                    |
|                | Replicate 2 | 32,922,776      | 28,587,422   |                                                          |
|                | Total       | 86,450,356      | 75,086,864   |                                                          |
| FGO 1lox/D329A | Replicate 1 | 57,388,928      | 48,663,969   | 0.989                                                    |
|                | Replicate 2 | 56,171,688      | 48,353,385   |                                                          |
|                | Total       | 113,560,616     | 97,017,354   |                                                          |
